# Supplementary material
Source: PubMed Central journal article supplement (PMC130630)

## A. T-cycles

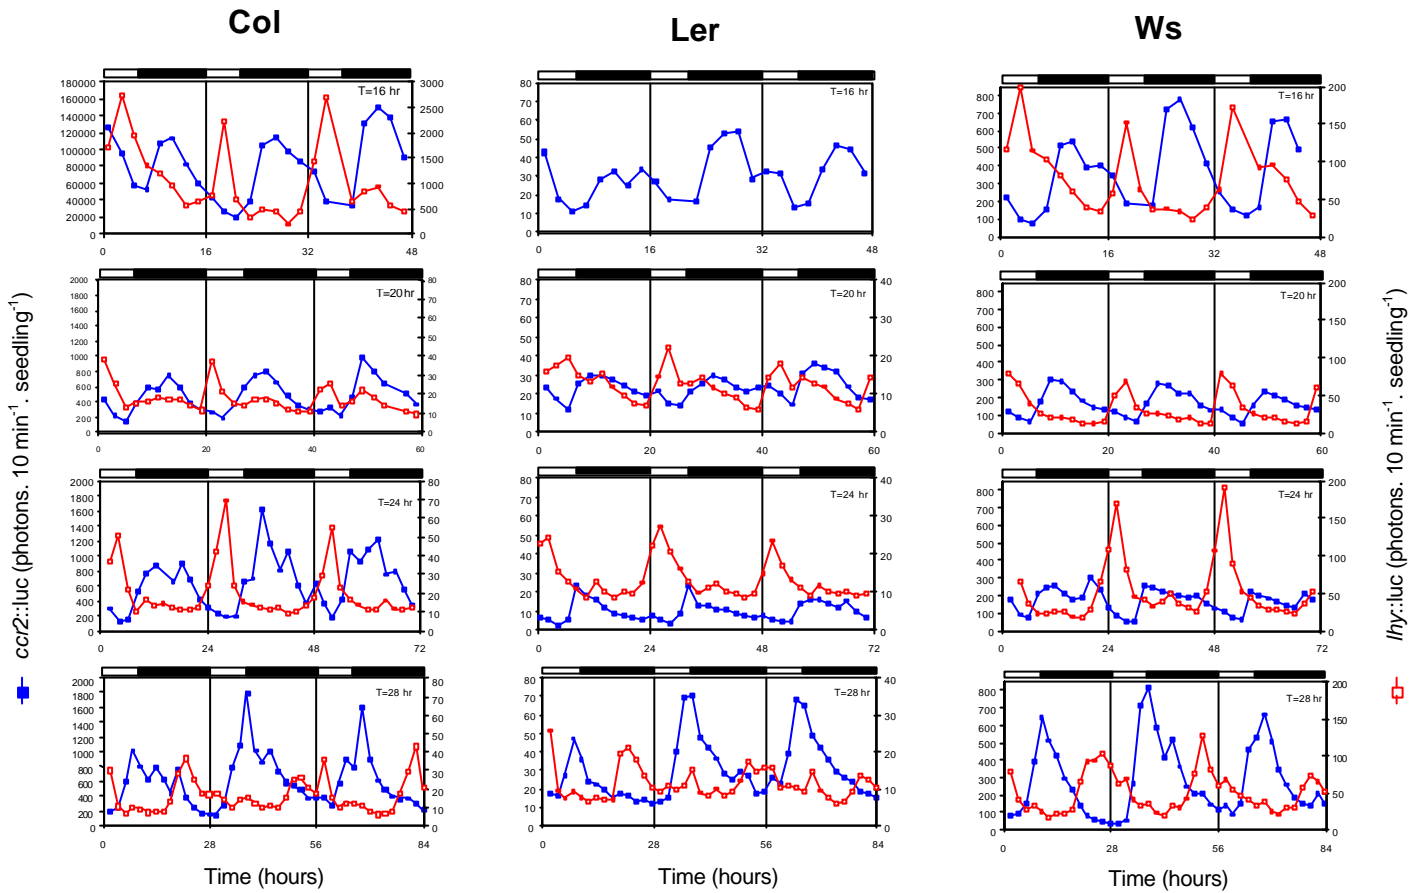

## B. Nanda-Hamner cycles

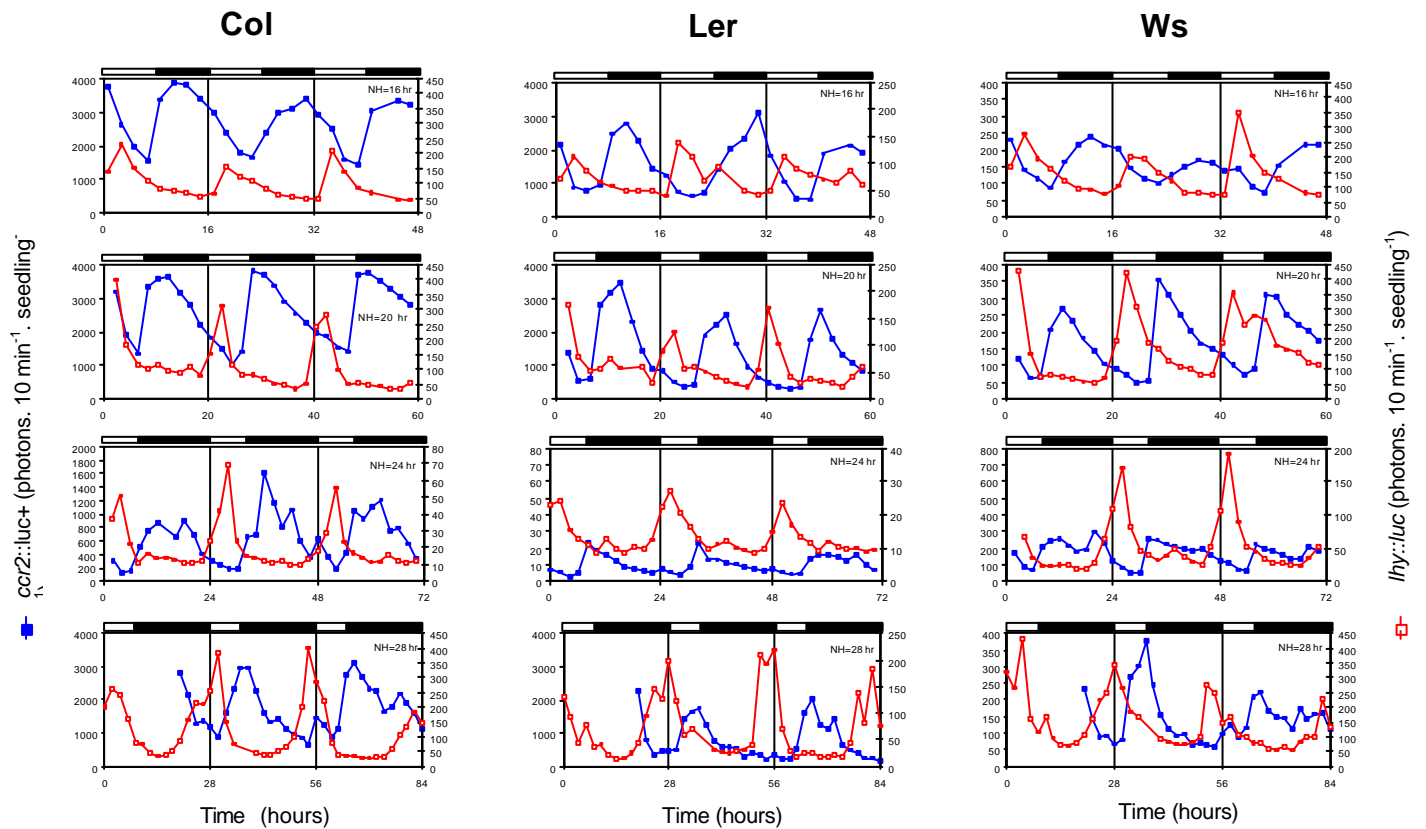

Supplement: pnas_192365599_3.pdf [file pnas_192365599_3.pdf]

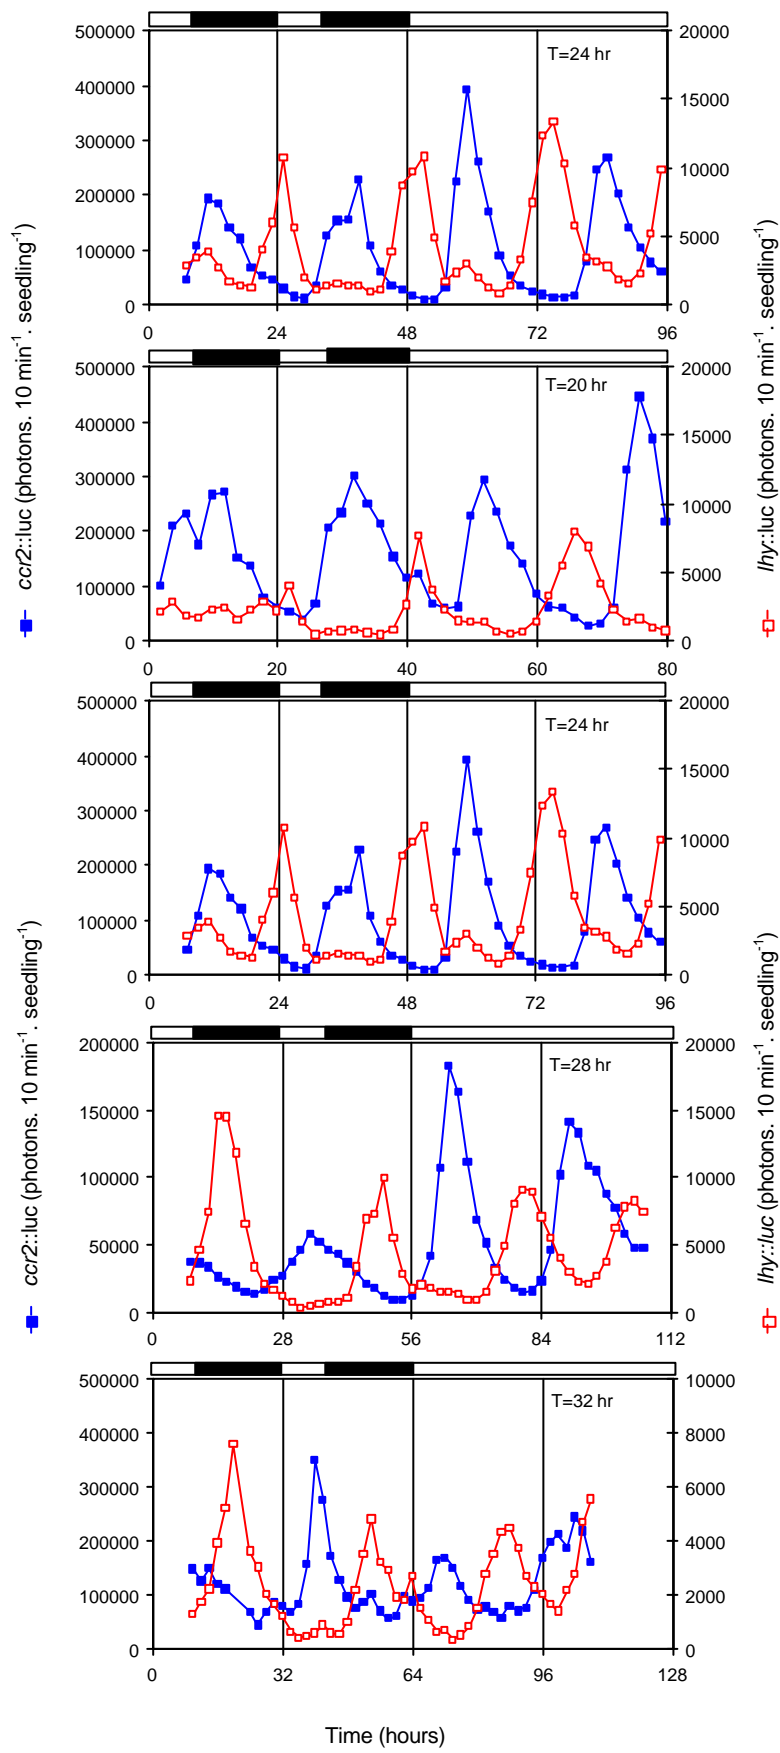

Supplement: pnas_192365599_4.pdf [file pnas_192365599_4.pdf]

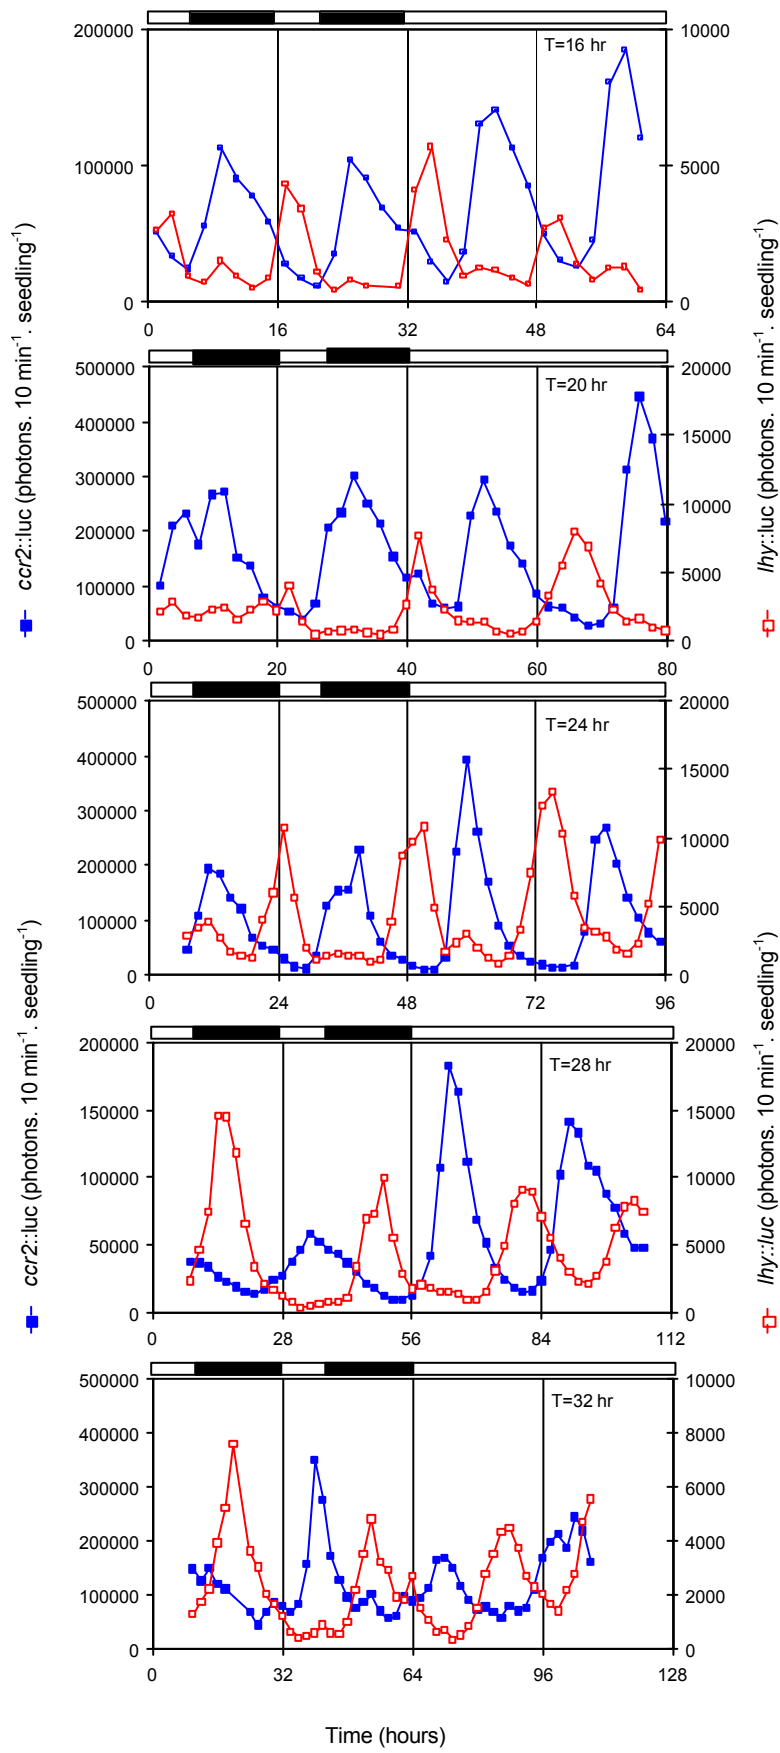

Supplement: pnas_192365599v2_1.pdf [file pnas_192365599v2_1.pdf]
